# Supplementary material for: Med23 serves as a gatekeeper of the myeloid potential of hematopoietic stem cells
Source: PubMed Central journal article supplement (PMC6138688; doi:10.1038/s41467-018-06282-2), 2018-09-14
Supplement: 41467_2018_6282_MOESM3_ESM.pdf [file 41467_2018_6282_MOESM3_ESM.pdf]

## Legends for Supplementary Data files

Supplementary Data 1. Differentially expressed genes between WT and Med23-deficient HSCs by single cell RNA-seq analysis.

Supplementary Data 2. Detailed information for antibodies and reagents.

Supplementary Data 3. Oligo-dT primers for single cell RNA-seq library constructions.
